# Supplementary material for: Study of receptor mediated selective anion transmembrane transport using parallel artificial membrane permeability assay
Source: Royal Society of Chemistry journal article supplement (doi:10.1039/c3an36760f), 2013-01-01
Supplement: c3an36760f.pdf [file c3an36760f.pdf]

## Supplementary data

### Study of Receptor Mediated Selective Anion Transmembrane Transport Using Parallel Artificial Membrane Permeability Assay

Lenka Veverková, Kamil Záruba, Vladimír Král

**Table S1.** Transport of anions by transmembrane transport agents **1** and **2**. Initial concentration of chloride in acceptor well was 10 mM

|                               | <b>C<sub>D</sub>(t=0)</b> | <b>C<sub>A</sub>(t) (2·σ)</b> | <b>C<sub>D</sub>(t) (2·σ)</b> | <b>C<sub>eq</sub></b> | <b>P</b> | <b>R</b> |
|-------------------------------|---------------------------|-------------------------------|-------------------------------|-----------------------|----------|----------|
| <b>1</b>                      | mM                        | mM                            | mM                            | mM                    | cm/s     |          |
| ReO <sub>4</sub> <sup>-</sup> | 10.00                     | 9.33 (0.17)                   | <0.7                          | 3.73                  | -        | 0.38     |
| SO <sub>4</sub> <sup>2-</sup> | 10.00                     | <0.07                         | 10.05 (0.43)                  | 6.03                  | 0        | 0.00     |
| NO <sub>3</sub> <sup>-</sup>  | 10.00                     | <0.07                         | 9.90 (0.07)                   | 5.94                  | 0        | 0.01     |
|                               | <b>C<sub>D</sub>(t=0)</b> | <b>C<sub>A</sub>(t) (2·σ)</b> | <b>C<sub>D</sub>(t) (2·σ)</b> | <b>C<sub>eq</sub></b> | <b>P</b> | <b>R</b> |
| <b>2</b>                      | mM                        | mM                            | mM                            | mM                    | cm/s     |          |
| ReO <sub>4</sub> <sup>-</sup> | 10.00                     | 9.30 (0.17)                   | <0.7                          | 3.72                  | -        | 0.38     |
| SO <sub>4</sub> <sup>2-</sup> | 10.00                     | <0.07                         | 9.92 (0.57)                   | 5.95                  | 0        | 0.01     |
| NO <sub>3</sub> <sup>-</sup>  | 10.00                     | <0.07                         | 9.83 (0.10)                   | 5.90                  | 0        | 0.02     |

**Table S2.** Co-transport of chlorides (from acceptor to donor wells) by **1** and **2**. Initial concentration of chloride in acceptor well was 10 mM

|                                                | <b>C<sub>A</sub>(t=0)</b> | <b>C<sub>A</sub>(t) (2·σ)</b> | <b>C<sub>D</sub>(t) (2·σ)</b> | <b>C<sub>eq</sub></b> | <b>P</b>             | <b>R</b> |
|------------------------------------------------|---------------------------|-------------------------------|-------------------------------|-----------------------|----------------------|----------|
| <b>1</b>                                       | mM                        | mM                            | mM                            | mM                    | cm/s                 |          |
| Cl <sup>-</sup> / -                            | 10.0                      | 7.69 (0.81)                   | 2.88 (0.00)                   | 4.8                   | 2.0·10 <sup>-5</sup> | -0.20    |
| Cl <sup>-</sup> /ReO <sub>4</sub> <sup>-</sup> | 10.0                      | 8.60 (0.00)                   | 1.59 (0.10)                   | 4.4                   | 1.0·10 <sup>-5</sup> | -0.10    |
| Cl <sup>-</sup> /SO <sub>4</sub> <sup>2-</sup> | 10.0                      | 7.24 (0.98)                   | 1.44 (0.35)                   | 3.8                   | 1.1·10 <sup>-5</sup> | 0.06     |
| Cl <sup>-</sup> /NO <sub>3</sub> <sup>-</sup>  | 10.0                      | 9.08 (0.15)                   | 0.99 (0.18)                   | 4.2                   | 5.9·10 <sup>-6</sup> | -0.06    |
|                                                | <b>C<sub>A</sub>(t=0)</b> | <b>C<sub>A</sub>(t) (2·σ)</b> | <b>C<sub>D</sub>(t) (2·σ)</b> | <b>C<sub>eq</sub></b> | <b>P</b>             | <b>R</b> |
| <b>2</b>                                       | mM                        | mM                            | mM                            | mM                    | cm/s                 |          |
| Cl <sup>-</sup> / -                            | 10.0                      | 7.66 (0.12)                   | 2.51 (0.17)                   | 4.6                   | 1.8·10 <sup>-5</sup> | -0.14    |
| Cl <sup>-</sup> /ReO <sub>4</sub> <sup>-</sup> | 10.0                      | 8.60 (0.02)                   | 2.20 (0.27)                   | 4.8                   | 1.4·10 <sup>-5</sup> | -0.19    |
| Cl <sup>-</sup> /SO <sub>4</sub> <sup>2-</sup> | 10.0                      | 7.24 (0.98)                   | 1.45 (0.21)                   | 3.8                   | 1.1·10 <sup>-5</sup> | 0.06     |
| Cl <sup>-</sup> /NO <sub>3</sub> <sup>-</sup>  | 10.0                      | 7.75 (0.54)                   | 2.29 (0.40)                   | 4.5                   | 1.6·10 <sup>-5</sup> | -0.12    |

**Table S3.** Transport of anions by transmembrane transport agents **1** and **2**. Initial concentration of chloride in acceptor well was 140 mM

|                               | <b>C<sub>D</sub>(t=0)</b> | <b>C<sub>A</sub>(t) (2·σ)</b> | <b>C<sub>D</sub>(t) (2·σ)</b> | <b>C<sub>eq</sub></b> | <b>P</b>             | <b>R</b> |
|-------------------------------|---------------------------|-------------------------------|-------------------------------|-----------------------|----------------------|----------|
| <b>1</b>                      | mM                        | mM                            | mM                            | mM                    | cm/s                 |          |
| ReO <sub>4</sub> <sup>-</sup> | 10.00                     | 9.22 (0.21)                   | <0.7                          | 3.69                  | -                    | 0.39     |
| SO <sub>4</sub> <sup>2-</sup> | 2.00                      | 0.32 (0.09)                   | 1.66 (0.19)                   | 1.12                  | 7.3·10 <sup>-6</sup> | 0.07     |
| NO <sub>3</sub> <sup>-</sup>  | 2.00                      | <0.07                         | 1.71 (0.43)                   | 1.03                  | 0                    | 0.14     |
|                               | <b>C<sub>D</sub>(t=0)</b> | <b>C<sub>A</sub>(t) (2·σ)</b> | <b>C<sub>D</sub>(t) (2·σ)</b> | <b>C<sub>eq</sub></b> | <b>P</b>             | <b>R</b> |
| <b>2</b>                      | mM                        | mM                            | mM                            | mM                    | cm/s                 |          |
| ReO <sub>4</sub> <sup>-</sup> | 10.00                     | 9.89 (0.28)                   | <0.7                          | 3.95                  | -                    | 0.34     |
| SO <sub>4</sub> <sup>2-</sup> | 2.00                      | <0.07                         | 1.42 (0.05)                   | 0.85                  | 0                    | 0.29     |
| NO <sub>3</sub> <sup>-</sup>  | 2.00                      | <0.07                         | 1.70 (0.09)                   | 1.02                  | 0                    | 0.15     |

**Table S4.** Co-transport of chlorides (from acceptor to donor wells) by **1** and **2**. Initial concentration of chloride in acceptor well was 10 mM

|                                                | <b>C<sub>D</sub>(t=0)</b> | <b>C<sub>A</sub>(t) (2·σ)</b> | <b>C<sub>D</sub>(t) (2·σ)</b> | <b>C<sub>eq</sub></b> | <b>P</b>             | <b>R</b> |
|------------------------------------------------|---------------------------|-------------------------------|-------------------------------|-----------------------|----------------------|----------|
| <b>1</b>                                       | mM                        | mM                            | mM                            | mM                    | cm/s                 |          |
| Cl <sup>-</sup> –                              | 140.3                     | 103.4 (3.9)                   | 31.8 (2.7)                    | 60.4                  | 1.7·10 <sup>-5</sup> | 0.08     |
| Cl <sup>-</sup> /ReO <sub>4</sub> <sup>-</sup> | 140.3                     | 102.4 (1.8)                   | 26.5 (3.5)                    | 56.9                  | 1.4·10 <sup>-5</sup> | 0.01     |
| Cl <sup>-</sup> /SO <sub>4</sub> <sup>2-</sup> | 140.3                     | 94.7 (2.3)                    | 25.4 (3.7)                    | 59.1                  | 2.0·10 <sup>-5</sup> | 0.05     |
| Cl <sup>-</sup> /NO <sub>3</sub> <sup>-</sup>  | 140.3                     | 99.3 (2.8)                    | 34.3 (3.4)                    | 60.3                  | 1.9·10 <sup>-5</sup> | 0.07     |
|                                                | <b>C<sub>D</sub>(t=0)</b> | <b>C<sub>A</sub>(t) (2·σ)</b> | <b>C<sub>D</sub>(t) (2·σ)</b> | <b>C<sub>eq</sub></b> | <b>P</b>             | <b>R</b> |
| <b>2</b>                                       | mM                        | mM                            | mM                            | mM                    | cm/s                 |          |
| Cl <sup>-</sup> –                              | 140.3                     | 105.1 (2.1)                   | 35.3 (3.5)                    | 63.2                  | 1.8·10 <sup>-5</sup> | 0.13     |
| Cl <sup>-</sup> /ReO <sub>4</sub> <sup>-</sup> | 140.3                     | 103.3 (4.8)                   | 25.1 (1.6)                    | 56.4                  | 1.3·10 <sup>-5</sup> | 0.00     |
| Cl <sup>-</sup> /SO <sub>4</sub> <sup>2-</sup> | 140.3                     | 91.7 (3.0)                    | 39.5 (3.8)                    | 60.4                  | 2.4·10 <sup>-5</sup> | 0.08     |
| Cl <sup>-</sup> /NO <sub>3</sub> <sup>-</sup>  | 140.3                     | 99.5 (3.0)                    | 34.7 (4.4)                    | 60.6                  | 1.9·10 <sup>-5</sup> | 0.08     |

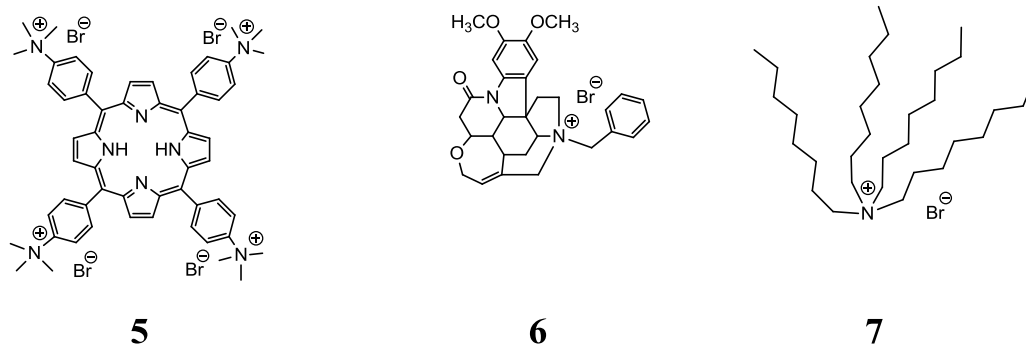

**Fig. S1.** Structures of other control quaternary ammonium salts and their numeric abbreviations
